# Supplementary material for: Quinone—Bodipy H-bonding interaction over π-stacking in toluene
Source: Royal Society of Chemistry journal article supplement (doi:10.1039/c5pp00035a), 2015-05-12
Supplement: c5pp00035a1.pdf [file c5pp00035a1.pdf]

## Supporting Information

### Quinone-Bodipy H-bonding interaction over $\pi$ -stacking in toluene

Animesh Karmakar<sup>a</sup>, Soumyaditya Mula<sup>b</sup>, Kalyan Ghosh<sup>c</sup>, Tandrima Chaudhuri<sup>a\*</sup>,  
Neelam Shivran<sup>b</sup>, Manas Banerjee<sup>c</sup> and Subrata Chattopadhyay<sup>b</sup>

<sup>a</sup>Department of Chemistry, Dr. Bhupendranath Dutta Smriti Mahavidyalaya, Burdwan-713407, India.

<sup>b</sup>Bio-Organic Division, Bhabha Atomic Research Centre, Trombay, Mumbai-400085, India.

<sup>c</sup>Department of Chemistry, The University of Burdwan, Golapbag, Burdwan-713104, India.

[tanchem\\_bu@yahoo.co.in](mailto:tanchem_bu@yahoo.co.in)

#### Index

- ◆ Copy of <sup>1</sup>H NMR spectra of the systems investigated.....page 2
- ◆ Absorption isosbestic of all five interacting systems.....page 8
- ◆ Fluorescence titration spectra of the five interacting systems.....page 9
- ◆ Coordinates of Monte Carlo conformers .....page 10

**Figure S1.**  $^1\text{H}$  NMR spectra of [a] Dye **1**, [b] **A1/1** (1:1), [c] **A3/1** (1:1) and [d] **A5/1** (1:1) adduct in  $d_8$ -toluene at 298K.

[a]

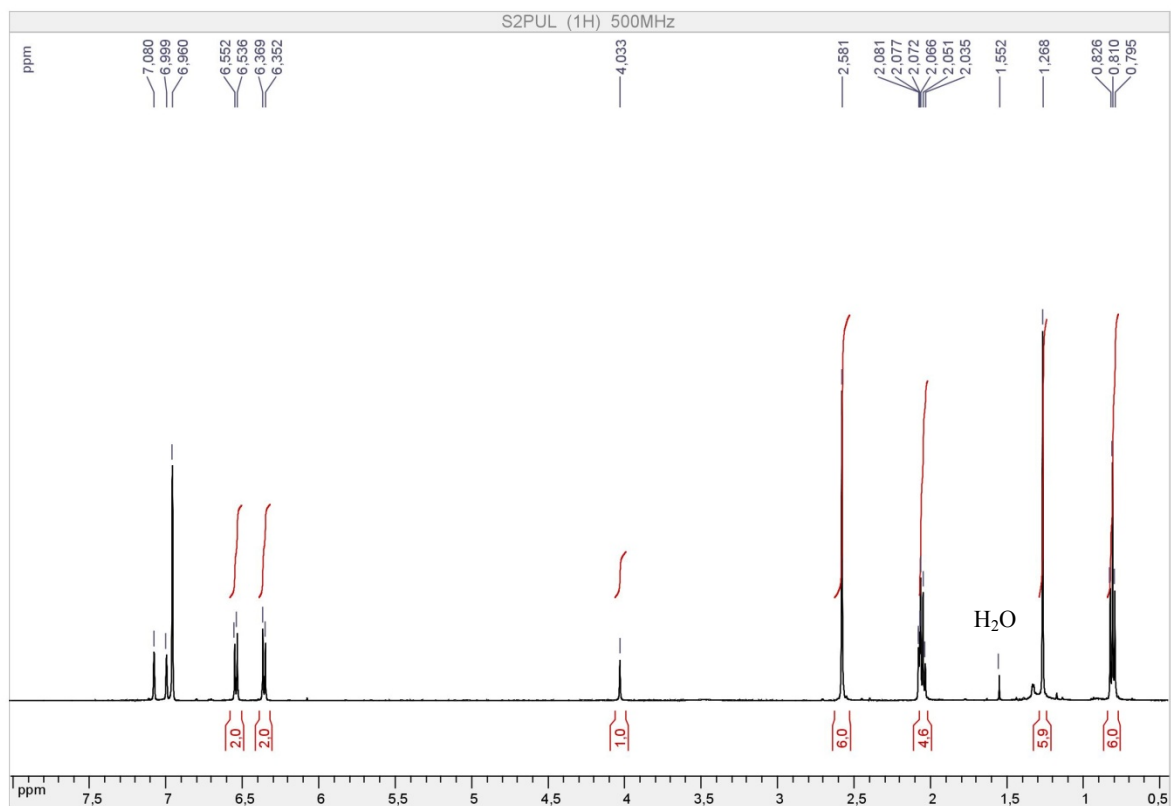

[b]

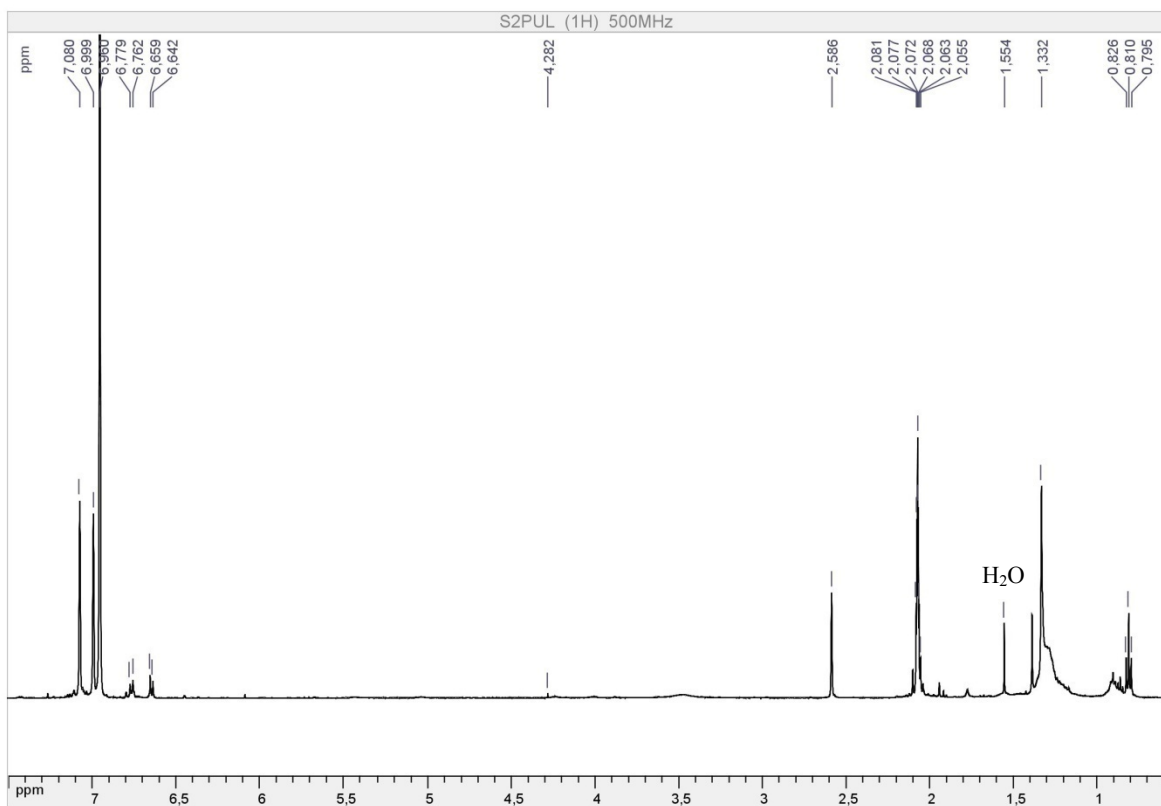

[c]

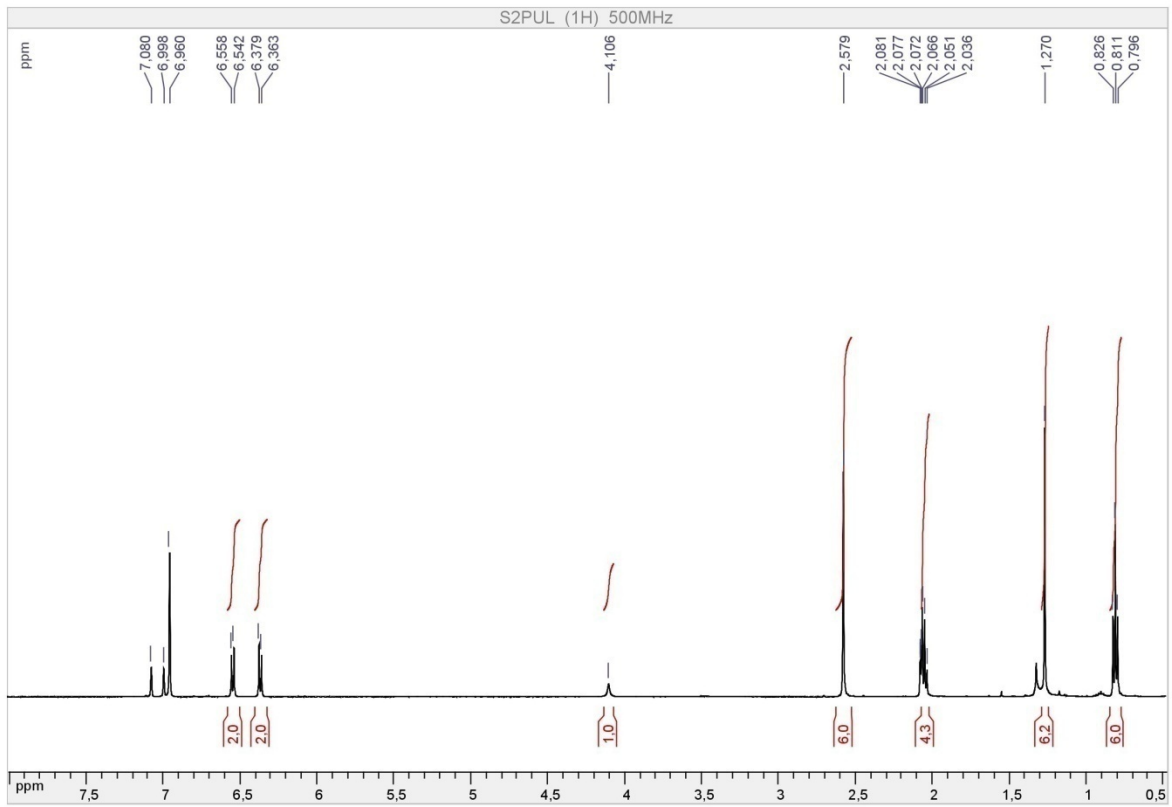

[d]

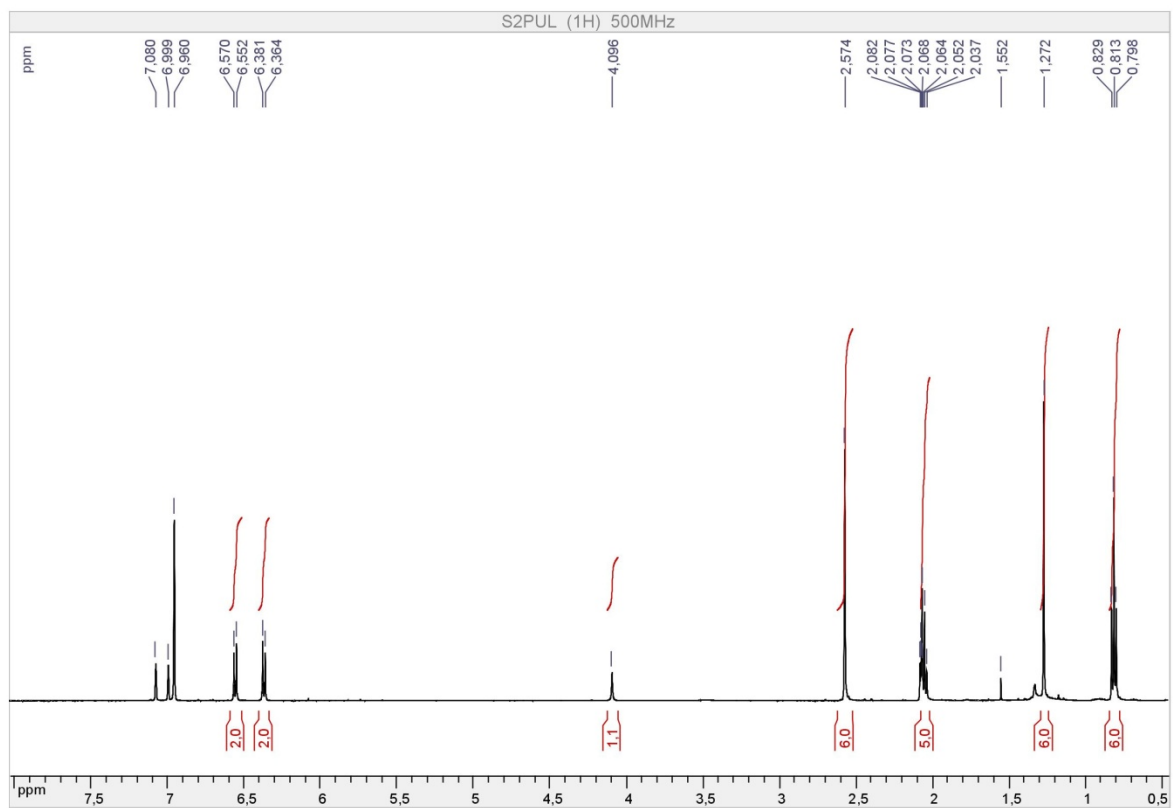

**Figure S2.**  $^1\text{H}$  NMR spectra of **A3/1** (1:1) adduct in  $d_8$ -toluene at [a] 313K and [b] 323K.

[a]

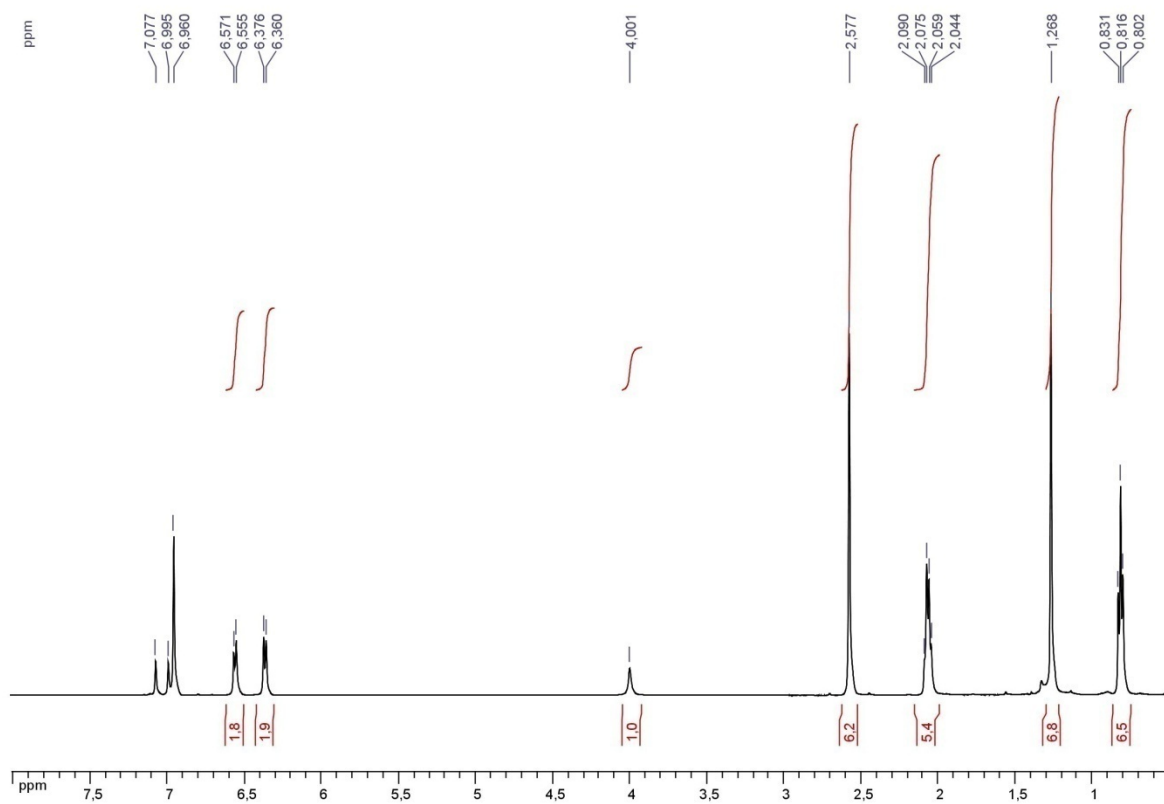

[b]

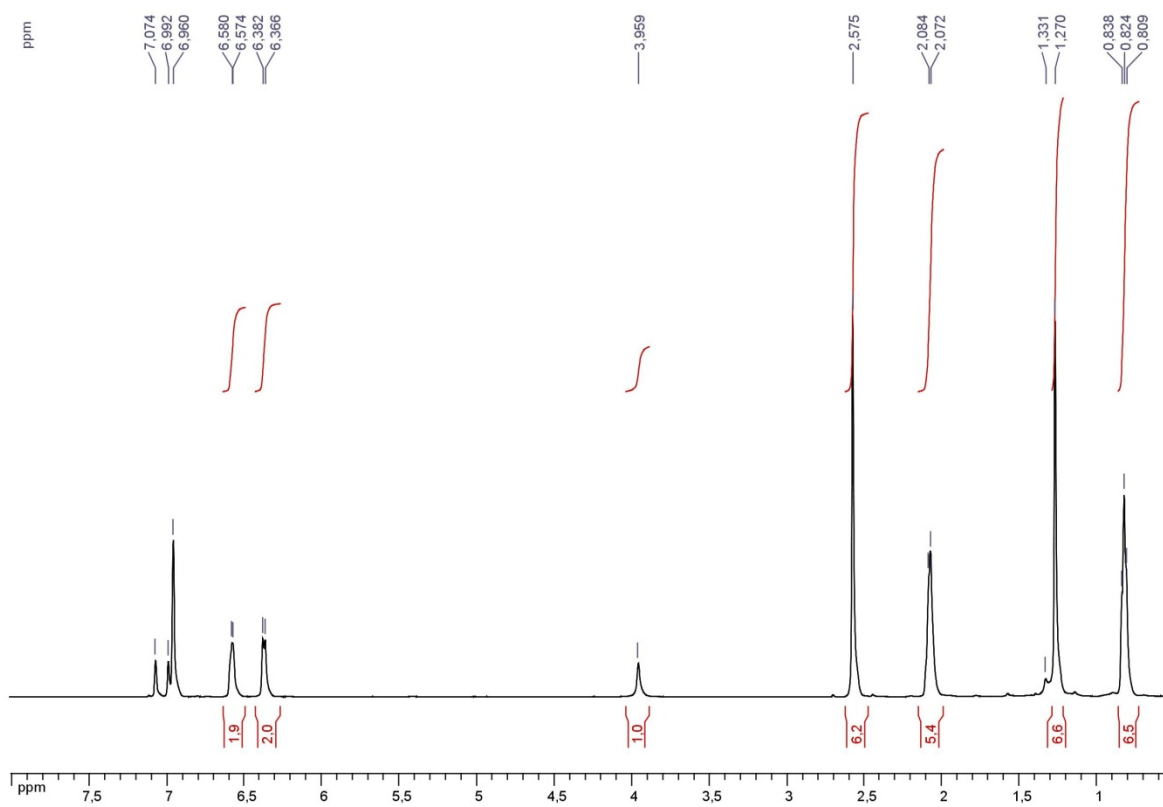

**Figure S3.** Ground state titration of the electron acceptors by dye **1** in toluene. Concentration of **1** dye: 0.00,  $3.843 \times 10^{-6}$ ,  $7.336 \times 10^{-6}$ ,  $1.053 \times 10^{-5}$ ,  $1.345 \times 10^{-5}$ ,  $1.614 \times 10^{-5}$ ,  $1.862 \times 10^{-5}$ ,  $2.092 \times 10^{-5}$  and  $2.306 \times 10^{-5}$  mol dm<sup>-3</sup> [A] At a fixed concentration ( $1.027 \times 10^{-4}$  mol dm<sup>-3</sup>) of the C<sub>70</sub> solution in toluene [B] at a fixed concentration ( $1.00 \times 10^{-4}$  mol dm<sup>-3</sup>) of the C<sub>60</sub> solution in toluene [C] At a fixed concentration ( $1.04 \times 10^{-4}$  mol dm<sup>-3</sup>) of the *o*-chloranil solution in toluene. [D] At a fixed concentration ( $1.00 \times 10^{-4}$  mol dm<sup>-3</sup>) of the *p*-chloranil solution in toluene. [E] At a fixed concentration ( $1.00 \times 10^{-4}$  mol dm<sup>-3</sup>) of the DDQ solution in toluene.

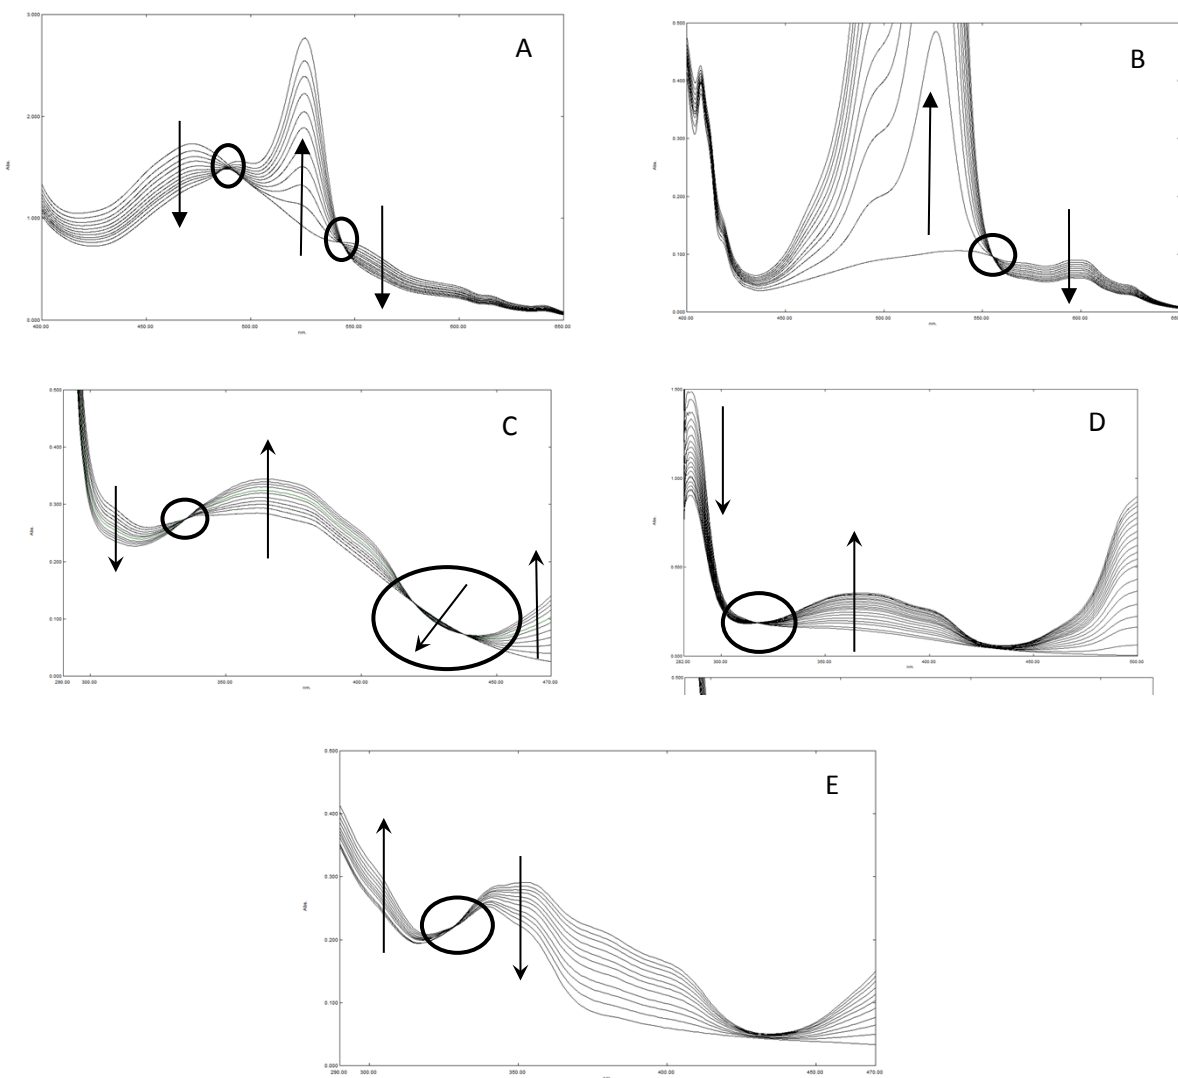



**Figure S4.** Excited state titration of the electron acceptors by dye **1** in toluene. Concentration of **1** dye: 0.00,  $7.336 \times 10^{-6}$ ,  $1.345 \times 10^{-5}$ ,  $1.862 \times 10^{-5}$ ,  $2.306 \times 10^{-5}$ ,  $2.69 \times 10^{-5}$ ,  $3.026 \times 10^{-5}$ ,  $3.323 \times 10^{-5}$  and  $3.587 \times 10^{-5}$  mol dm<sup>-3</sup> [A] at a fixed concentration ( $1.027 \times 10^{-4}$  mol dm<sup>-3</sup>) of the C<sub>70</sub> solution in toluene. [B] At a fixed concentration ( $1.00 \times 10^{-4}$  mol dm<sup>-3</sup>) of the C<sub>60</sub> solution in toluene. [C] At a fixed concentration ( $1.04 \times 10^{-4}$  mol dm<sup>-3</sup>) of the *o*-chloranil solution in toluene. [D] At a fixed concentration ( $1.00 \times 10^{-4}$  mol dm<sup>-3</sup>) of the *p*-chloranil solution in toluene. [E] At a fixed concentration ( $1.00 \times 10^{-4}$  mol dm<sup>-3</sup>) of the DDQ solution in Toluene.

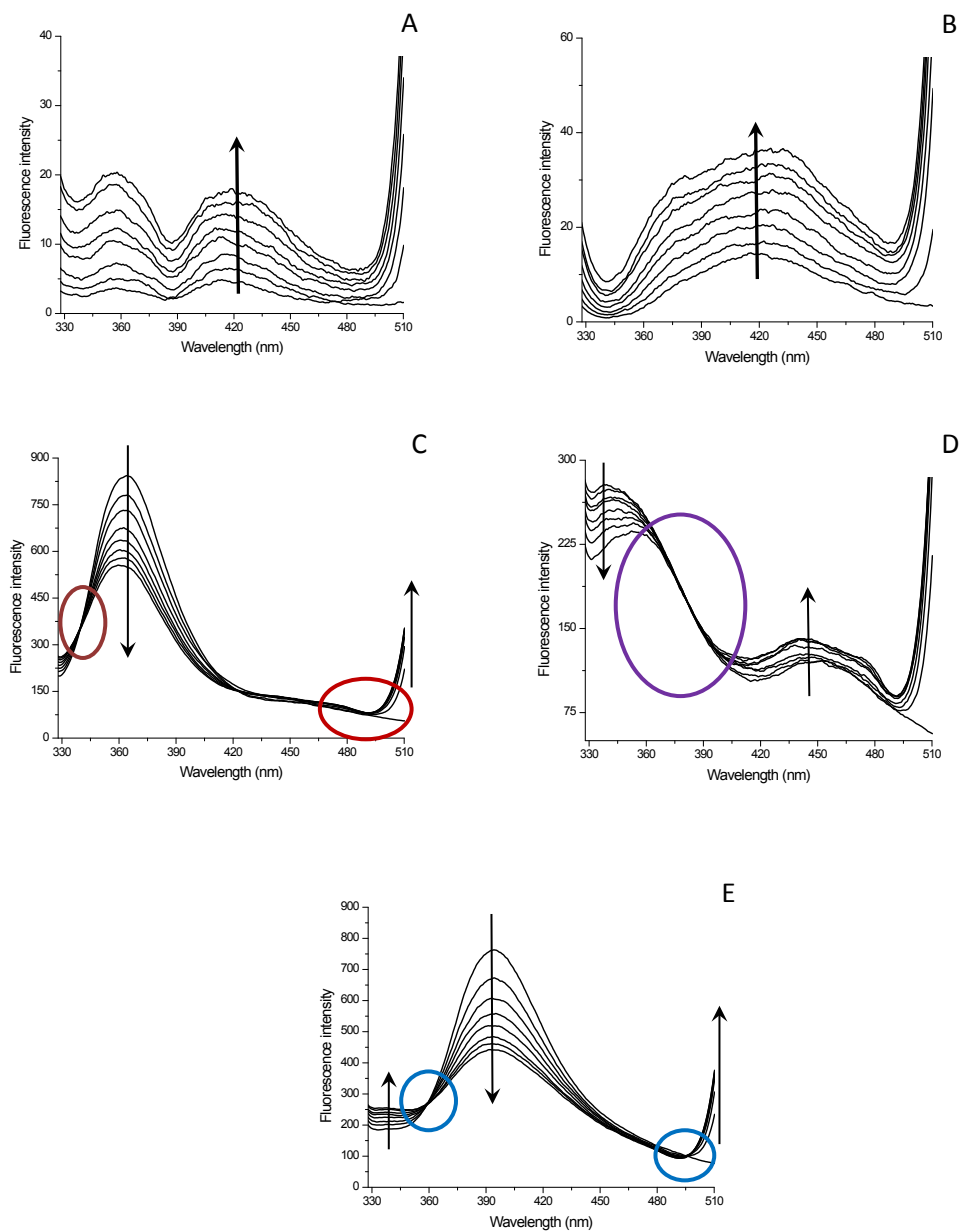

## 1. Coordinates of Monte Carlo global minimum conformer of **Dye 1 dimer**

| Center Number | Atomic Number | Atomic Type | Coordinates (Angstroms) |           |           |
|---------------|---------------|-------------|-------------------------|-----------|-----------|
|               |               |             | X                       | Y         | Z         |
| 1             | 7             | 0           | 3.170000                | -1.116000 | -2.433000 |
| 2             | 6             | 0           | 1.794000                | -0.997000 | -2.464000 |
| 3             | 6             | 0           | 1.069000                | 0.221000  | -2.601000 |
| 4             | 6             | 0           | 1.880000                | 1.381000  | -2.692000 |
| 5             | 7             | 0           | 3.257000                | 1.411000  | -2.608000 |
| 6             | 6             | 0           | 1.324000                | -2.304000 | -2.278000 |
| 7             | 6             | 0           | 2.475000                | -3.186000 | -2.190000 |
| 8             | 6             | 0           | 1.505000                | 2.718000  | -2.868000 |
| 9             | 6             | 0           | 3.607000                | -2.394000 | -2.283000 |
| 10            | 6             | 0           | 2.712000                | 3.527000  | -2.847000 |
| 11            | 6             | 0           | 3.781000                | 2.664000  | -2.673000 |
| 12            | 5             | 0           | 4.121000                | 0.121000  | -2.392000 |
| 13            | 9             | 0           | 5.104000                | 0.015000  | -3.423000 |
| 14            | 9             | 0           | 4.800000                | 0.185000  | -1.092000 |
| 15            | 6             | 0           | -0.396000               | 0.273000  | -2.558000 |
| 16            | 6             | 0           | -1.048000               | 0.623000  | -1.365000 |
| 17            | 6             | 0           | -1.188000               | -0.071000 | -3.666000 |
| 18            | 6             | 0           | -2.434000               | 0.552000  | -1.249000 |
| 19            | 1             | 0           | -0.466000               | 0.931000  | -0.501000 |
| 20            | 6             | 0           | -2.585000               | -0.129000 | -3.557000 |
| 21            | 1             | 0           | -0.708000               | -0.335000 | -4.604000 |
| 22            | 6             | 0           | -3.192000               | 0.154000  | -2.339000 |
| 23            | 1             | 0           | -2.901000               | 0.780000  | -0.295000 |
| 24            | 1             | 0           | -3.188000               | -0.431000 | -4.406000 |
| 25            | 6             | 0           | 0.130000                | 3.277000  | -3.039000 |
| 26            | 1             | 0           | -0.420000               | 2.745000  | -3.820000 |
| 27            | 1             | 0           | -0.424000               | 3.235000  | -2.098000 |
| 28            | 1             | 0           | 0.152000                | 4.327000  | -3.344000 |
| 29            | 6             | 0           | -0.088000               | -2.780000 | -2.148000 |
| 30            | 1             | 0           | -0.634000               | -2.211000 | -1.392000 |
| 31            | 1             | 0           | -0.604000               | -2.721000 | -3.109000 |
| 32            | 1             | 0           | -0.137000               | -3.824000 | -1.826000 |
| 33            | 6             | 0           | 2.457000                | -4.670000 | -1.990000 |
| 34            | 1             | 0           | 1.598000                | -5.109000 | -2.510000 |
| 35            | 1             | 0           | 3.343000                | -5.120000 | -2.452000 |
| 36            | 6             | 0           | 5.052000                | -2.710000 | -2.219000 |
| 37            | 1             | 0           | 5.545000                | -2.465000 | -3.165000 |
| 38            | 1             | 0           | 5.542000                | -2.153000 | -1.414000 |
| 39            | 1             | 0           | 5.221000                | -3.773000 | -2.025000 |
| 40            | 6             | 0           | 5.240000                | 2.890000  | -2.557000 |
| 41            | 1             | 0           | 5.765000                | 2.481000  | -3.426000 |
| 42            | 1             | 0           | 5.476000                | 3.957000  | -2.501000 |
| 43            | 1             | 0           | 5.643000                | 2.425000  | -1.653000 |
| 44            | 6             | 0           | 2.798000                | 5.017000  | -2.972000 |
| 45            | 1             | 0           | 2.079000                | 5.374000  | -3.716000 |
| 46            | 1             | 0           | 3.784000                | 5.306000  | -3.353000 |
| 47            | 6             | 0           | 2.553000                | 5.721000  | -1.645000 |
| 48            | 1             | 0           | 2.629000                | 6.805000  | -1.772000 |
| 49            | 1             | 0           | 1.556000                | 5.494000  | -1.252000 |
| 50            | 1             | 0           | 3.288000                | 5.414000  | -0.893000 |
| 51            | 6             | 0           | 2.413000                | -5.052000 | -0.517000 |
| 52            | 1             | 0           | 3.287000                | -4.665000 | 0.018000  |
| 53            | 1             | 0           | 1.518000                | -4.653000 | -0.028000 |
| 54            | 1             | 0           | 2.402000                | -6.141000 | -0.408000 |

|     |   |   |           |           |           |
|-----|---|---|-----------|-----------|-----------|
| 55  | 8 | 0 | -4.545000 | 0.014000  | -2.217000 |
| 56  | 1 | 0 | -4.734000 | 0.025000  | -1.253000 |
| 57  | 7 | 0 | -3.257000 | -1.411000 | 2.608000  |
| 58  | 6 | 0 | -1.880000 | -1.381000 | 2.692000  |
| 59  | 6 | 0 | -1.069000 | -0.221000 | 2.601000  |
| 60  | 6 | 0 | -1.794000 | 0.997000  | 2.464000  |
| 61  | 7 | 0 | -3.170000 | 1.116000  | 2.433000  |
| 62  | 6 | 0 | -1.505000 | -2.718000 | 2.868000  |
| 63  | 6 | 0 | -2.712000 | -3.527000 | 2.847000  |
| 64  | 6 | 0 | -1.324000 | 2.304000  | 2.278000  |
| 65  | 6 | 0 | -3.781000 | -2.664000 | 2.673000  |
| 66  | 6 | 0 | -2.475000 | 3.186000  | 2.190000  |
| 67  | 6 | 0 | -3.607000 | 2.394000  | 2.283000  |
| 68  | 5 | 0 | -4.121000 | -0.121000 | 2.392000  |
| 69  | 9 | 0 | -5.104000 | -0.015000 | 3.423000  |
| 70  | 9 | 0 | -4.800000 | -0.185000 | 1.092000  |
| 71  | 6 | 0 | 0.396000  | -0.273000 | 2.558000  |
| 72  | 6 | 0 | 1.048000  | -0.623000 | 1.365000  |
| 73  | 6 | 0 | 1.188000  | 0.071000  | 3.666000  |
| 74  | 6 | 0 | 2.434000  | -0.552000 | 1.249000  |
| 75  | 1 | 0 | 0.466000  | -0.931000 | 0.501000  |
| 76  | 6 | 0 | 2.585000  | 0.129000  | 3.557000  |
| 77  | 1 | 0 | 0.708000  | 0.335000  | 4.604000  |
| 78  | 6 | 0 | 3.192000  | -0.154000 | 2.339000  |
| 79  | 1 | 0 | 2.901000  | -0.780000 | 0.295000  |
| 80  | 1 | 0 | 3.188000  | 0.431000  | 4.406000  |
| 81  | 6 | 0 | 0.088000  | 2.780000  | 2.148000  |
| 82  | 1 | 0 | 0.604000  | 2.721000  | 3.109000  |
| 83  | 1 | 0 | 0.634000  | 2.211000  | 1.392000  |
| 84  | 1 | 0 | 0.137000  | 3.824000  | 1.826000  |
| 85  | 6 | 0 | -0.130000 | -3.277000 | 3.039000  |
| 86  | 1 | 0 | 0.424000  | -3.235000 | 2.098000  |
| 87  | 1 | 0 | 0.420000  | -2.745000 | 3.820000  |
| 88  | 1 | 0 | -0.152000 | -4.327000 | 3.344000  |
| 89  | 6 | 0 | -2.798000 | -5.017000 | 2.972000  |
| 90  | 1 | 0 | -2.079000 | -5.374000 | 3.716000  |
| 91  | 1 | 0 | -3.784000 | -5.306000 | 3.353000  |
| 92  | 6 | 0 | -5.240000 | -2.890000 | 2.557000  |
| 93  | 1 | 0 | -5.765000 | -2.481000 | 3.426000  |
| 94  | 1 | 0 | -5.643000 | -2.425000 | 1.653000  |
| 95  | 1 | 0 | -5.476000 | -3.957000 | 2.501000  |
| 96  | 6 | 0 | -5.052000 | 2.710000  | 2.219000  |
| 97  | 1 | 0 | -5.545000 | 2.465000  | 3.165000  |
| 98  | 1 | 0 | -5.221000 | 3.773000  | 2.025000  |
| 99  | 1 | 0 | -5.542000 | 2.153000  | 1.414000  |
| 100 | 6 | 0 | -2.457000 | 4.670000  | 1.990000  |
| 101 | 1 | 0 | -1.598000 | 5.109000  | 2.510000  |
| 102 | 1 | 0 | -3.343000 | 5.120000  | 2.452000  |
| 103 | 6 | 0 | -2.413000 | 5.052000  | 0.517000  |
| 104 | 1 | 0 | -2.402000 | 6.141000  | 0.408000  |
| 105 | 1 | 0 | -1.518000 | 4.653000  | 0.028000  |
| 106 | 1 | 0 | -3.287000 | 4.665000  | -0.018000 |
| 107 | 6 | 0 | -2.553000 | -5.721000 | 1.645000  |
| 108 | 1 | 0 | -3.288000 | -5.414000 | 0.893000  |
| 109 | 1 | 0 | -1.556000 | -5.494000 | 1.252000  |
| 110 | 1 | 0 | -2.629000 | -6.805000 | 1.772000  |
| 111 | 8 | 0 | 4.545000  | -0.014000 | 2.217000  |
| 112 | 1 | 0 | 4.734000  | -0.025000 | 1.253000  |

---

## 2. Coordinates of Monte Carlo global minimum conformer of **A1/1 adduct**

| Center<br>Number | Atomic<br>Number | Atomic<br>Type | Coordinates (Angstroms) |           |           |
|------------------|------------------|----------------|-------------------------|-----------|-----------|
|                  |                  |                | X                       | Y         | Z         |
| 1                | 7                | 0              | -4.214789               | -1.457941 | 1.919947  |
| 2                | 6                | 0              | -4.714748               | -0.313271 | 1.332619  |
| 3                | 6                | 0              | -4.982422               | -0.142692 | -0.051316 |
| 4                | 6                | 0              | -4.598440               | -1.242929 | -0.863272 |
| 5                | 7                | 0              | -4.094317               | -2.444130 | -0.404224 |
| 6                | 6                | 0              | -4.855953               | 0.595513  | 2.389220  |
| 7                | 6                | 0              | -4.404594               | -0.059116 | 3.605139  |
| 8                | 6                | 0              | -4.610028               | -1.370697 | -2.257657 |
| 9                | 6                | 0              | -4.020014               | -1.344591 | 3.260123  |
| 10               | 6                | 0              | -4.108908               | -2.693246 | -2.588890 |
| 11               | 6                | 0              | -3.795167               | -3.323734 | -1.396472 |
| 12               | 5                | 0              | -3.903425               | -2.745324 | 1.107985  |
| 13               | 9                | 0              | -4.782422               | -3.748868 | 1.487792  |
| 14               | 9                | 0              | -2.650713               | -3.165396 | 1.355273  |
| 15               | 6                | 0              | -5.642945               | 1.047042  | -0.593098 |
| 16               | 6                | 0              | -7.041872               | 1.071525  | -0.734515 |
| 17               | 6                | 0              | -4.918141               | 2.184927  | -0.982187 |
| 18               | 6                | 0              | -7.692454               | 2.193985  | -1.251449 |
| 19               | 1                | 0              | -7.622224               | 0.200003  | -0.435722 |
| 20               | 6                | 0              | -5.564742               | 3.311479  | -1.498487 |
| 21               | 1                | 0              | -3.838170               | 2.201302  | -0.874446 |
| 22               | 6                | 0              | -6.949239               | 3.304816  | -1.628828 |
| 23               | 1                | 0              | -8.772489               | 2.196999  | -1.354601 |
| 24               | 1                | 0              | -4.967067               | 4.170049  | -1.784586 |
| 25               | 6                | 0              | -5.027535               | -0.360211 | -3.274748 |
| 26               | 1                | 0              | -6.090819               | -0.125942 | -3.180624 |
| 27               | 1                | 0              | -4.434548               | 0.553508  | -3.178732 |
| 28               | 1                | 0              | -4.871814               | -0.717769 | -4.296020 |
| 29               | 6                | 0              | -5.333545               | 2.009177  | 2.334253  |
| 30               | 1                | 0              | -4.653499               | 2.621956  | 1.736936  |
| 31               | 1                | 0              | -6.345332               | 2.067624  | 1.926998  |
| 32               | 1                | 0              | -5.371527               | 2.468870  | 3.325930  |
| 33               | 6                | 0              | -4.346800               | 0.531862  | 4.979628  |
| 34               | 1                | 0              | -5.197210               | 1.205831  | 5.136987  |
| 35               | 1                | 0              | -4.453681               | -0.255906 | 5.733510  |
| 36               | 6                | 0              | -3.484498               | -2.474654 | 4.055366  |
| 37               | 1                | 0              | -4.064790               | -3.386654 | 3.885798  |
| 38               | 1                | 0              | -2.439462               | -2.670305 | 3.793234  |
| 39               | 1                | 0              | -3.518218               | -2.262704 | 5.127413  |
| 40               | 6                | 0              | -3.251654               | -4.668178 | -1.089998 |
| 41               | 1                | 0              | -3.898445               | -5.204892 | -0.389545 |
| 42               | 1                | 0              | -3.166941               | -5.281298 | -1.991934 |
| 43               | 1                | 0              | -2.251362               | -4.591204 | -0.653420 |
| 44               | 6                | 0              | -3.953562               | -3.282898 | -3.957082 |
| 45               | 1                | 0              | -4.750008               | -2.920213 | -4.616083 |
| 46               | 1                | 0              | -4.081715               | -4.370815 | -3.913798 |
| 47               | 6                | 0              | -2.598516               | -2.964346 | -4.572295 |
| 48               | 1                | 0              | -2.524877               | -3.399354 | -5.573421 |
| 49               | 1                | 0              | -2.444038               | -1.884303 | -4.657568 |
| 50               | 1                | 0              | -1.784616               | -3.373750 | -3.964302 |
| 51               | 6                | 0              | -3.046845               | 1.283264  | 5.224982  |
| 52               | 1                | 0              | -2.180658               | 0.621061  | 5.116630  |
| 53               | 1                | 0              | -2.926431               | 2.110706  | 4.518087  |
| 54               | 1                | 0              | -3.033103               | 1.697862  | 6.238157  |

|     |   |   |           |           |           |
|-----|---|---|-----------|-----------|-----------|
| 55  | 8 | 0 | -7.616205 | 4.385296  | -2.128348 |
| 56  | 1 | 0 | -6.958627 | 5.072658  | -2.322616 |
| 57  | 6 | 0 | 5.224021  | -2.733459 | -0.661125 |
| 58  | 6 | 0 | 5.544053  | -2.323167 | 0.761325  |
| 59  | 6 | 0 | 4.480126  | -2.904603 | 1.666743  |
| 60  | 6 | 0 | 3.503504  | -3.673503 | 0.804418  |
| 61  | 6 | 0 | 3.961508  | -3.568708 | -0.633172 |
| 62  | 6 | 0 | 5.544918  | -1.926280 | -1.749025 |
| 63  | 6 | 0 | 6.176315  | -1.117967 | 1.052802  |
| 64  | 6 | 0 | 3.059710  | -3.574467 | -1.694441 |
| 65  | 6 | 0 | 4.079891  | -2.266481 | 2.836971  |
| 66  | 6 | 0 | 2.158967  | -3.782963 | 1.139282  |
| 67  | 6 | 0 | 4.522655  | -0.829887 | 2.916052  |
| 68  | 6 | 0 | 5.467813  | -0.312251 | 2.111632  |
| 69  | 6 | 0 | 5.890238  | -0.512057 | -1.362767 |
| 70  | 6 | 0 | 6.175801  | -0.147895 | -0.099794 |
| 71  | 6 | 0 | 4.385499  | -1.697585 | -2.686799 |
| 72  | 6 | 0 | 3.265259  | -2.439578 | -2.662131 |
| 73  | 6 | 0 | 2.582682  | -2.117051 | 2.960795  |
| 74  | 6 | 0 | 1.714171  | -2.802640 | 2.195785  |
| 75  | 6 | 0 | 1.629160  | -3.339178 | -1.270206 |
| 76  | 6 | 0 | 1.223285  | -3.431097 | 0.009100  |
| 77  | 6 | 0 | 5.805707  | 1.217600  | 0.363430  |
| 78  | 6 | 0 | 5.375055  | 1.117301  | 1.708962  |
| 79  | 6 | 0 | 4.297053  | -0.261473 | -3.068965 |
| 80  | 6 | 0 | 5.213008  | 0.459540  | -2.264253 |
| 81  | 6 | 0 | 1.965012  | -1.808491 | -3.020441 |
| 82  | 6 | 0 | 0.970788  | -2.353551 | -2.174051 |
| 83  | 6 | 0 | 0.424512  | -2.162895 | 1.817601  |
| 84  | 6 | 0 | 0.131855  | -2.541150 | 0.486591  |
| 85  | 6 | 0 | 2.228311  | -0.742274 | 3.412035  |
| 86  | 6 | 0 | 3.407192  | 0.040051  | 3.383394  |
| 87  | 6 | 0 | 5.279163  | 2.197539  | -0.497115 |
| 88  | 6 | 0 | 4.406482  | 1.994364  | 2.228431  |
| 89  | 6 | 0 | 1.865683  | -0.489096 | -3.502125 |
| 90  | 6 | 0 | 3.358270  | 1.421141  | 3.120941  |
| 91  | 6 | 0 | 4.962486  | 1.792949  | -1.896977 |
| 92  | 6 | 0 | 0.967622  | -0.161925 | 3.177134  |
| 93  | 6 | 0 | -0.145291 | -1.590807 | -1.787047 |
| 94  | 6 | 0 | 0.007121  | -0.918780 | 2.326684  |
| 95  | 6 | 0 | 3.108321  | 0.334110  | -3.527848 |
| 96  | 6 | 0 | -0.583709 | -1.686877 | -0.369488 |
| 97  | 6 | 0 | 0.906450  | 1.244564  | 3.138662  |
| 98  | 6 | 0 | 2.978183  | 1.722248  | -3.344166 |
| 99  | 6 | 0 | 2.087330  | 2.024835  | 3.109135  |
| 100 | 6 | 0 | 3.893147  | 2.442256  | -2.539362 |
| 101 | 6 | 0 | -1.178017 | -0.555294 | 0.212083  |
| 102 | 6 | 0 | 4.485855  | 3.201387  | 0.089244  |
| 103 | 6 | 0 | -0.893358 | -0.177098 | 1.543233  |
| 104 | 6 | 0 | 4.056185  | 3.101022  | 1.433762  |
| 105 | 6 | 0 | -0.351124 | -0.366934 | -2.450416 |
| 106 | 6 | 0 | 0.643100  | 0.178126  | -3.296806 |
| 107 | 6 | 0 | -1.016918 | 1.304143  | 1.628679  |
| 108 | 6 | 0 | -1.492773 | 0.673876  | -0.557126 |
| 109 | 6 | 0 | 2.739759  | 3.788497  | 1.543917  |
| 110 | 6 | 0 | -1.098937 | 0.766557  | -1.838288 |
| 111 | 6 | 0 | -0.150364 | 1.988866  | 2.395792  |
| 112 | 6 | 0 | 0.536170  | 1.663083  | -3.230972 |
| 113 | 6 | 0 | 3.447747  | 3.952853  | -0.667509 |
| 114 | 6 | 0 | 1.657436  | 2.404161  | -3.254587 |
| 115 | 6 | 0 | 1.794601  | 3.270861  | 2.348337  |
| 116 | 6 | 0 | 3.163183  | 3.588698  | -1.930500 |

|     |   |   |           |          |           |
|-----|---|---|-----------|----------|-----------|
| 117 | 6 | 0 | 2.420774  | 4.530349 | 0.271172  |
| 118 | 6 | 0 | 1.788369  | 3.720958 | -2.531561 |
| 119 | 6 | 0 | -0.698883 | 2.077742 | -2.477309 |
| 120 | 6 | 0 | -1.591618 | 1.868309 | 0.356346  |
| 121 | 6 | 0 | 0.323332  | 3.383822 | 2.055212  |
| 122 | 6 | 0 | 0.790270  | 3.933323 | -1.584503 |
| 123 | 6 | 0 | 1.110302  | 4.343614 | -0.162053 |
| 124 | 6 | 0 | -0.471235 | 3.097083 | -1.556495 |
| 125 | 6 | 0 | -0.926213 | 2.991387 | -0.117887 |
| 126 | 6 | 0 | 0.047384  | 3.761189 | 0.743420  |

---

### 3. Coordinates of Monte Carlo global minimum conformer of **A2/1 adduct**

| Center Number | Atomic Number | Atomic Type | Coordinates (Angstroms) |           |           |
|---------------|---------------|-------------|-------------------------|-----------|-----------|
|               |               |             | X                       | Y         | Z         |
| 1             | 7             | 0           | 4.080596                | 1.259377  | -1.833617 |
| 2             | 6             | 0           | 4.413326                | 1.193332  | -0.494803 |
| 3             | 6             | 0           | 4.647718                | -0.000320 | 0.237155  |
| 4             | 6             | 0           | 4.413700                | -1.193006 | -0.495010 |
| 5             | 7             | 0           | 4.079741                | -1.259778 | -1.833789 |
| 6             | 6             | 0           | 4.431513                | 2.524780  | -0.063750 |
| 7             | 6             | 0           | 4.094068                | 3.366022  | -1.200383 |
| 8             | 6             | 0           | 4.431260                | -2.525313 | -0.063823 |
| 9             | 6             | 0           | 3.888831                | 2.527691  | -2.283438 |
| 10            | 6             | 0           | 4.094120                | -3.365893 | -1.199467 |
| 11            | 6             | 0           | 3.888435                | -2.527596 | -2.283444 |
| 12            | 5             | 0           | 3.996975                | -0.000631 | -2.733046 |
| 13            | 9             | 0           | 5.077588                | -0.000047 | -3.640486 |
| 14            | 9             | 0           | 2.785183                | -0.000518 | -3.472903 |
| 15            | 6             | 0           | 5.136685                | 0.000339  | 1.617136  |
| 16            | 6             | 0           | 4.260851                | 0.000408  | 2.713619  |
| 17            | 6             | 0           | 6.519512                | 0.000211  | 1.868457  |
| 18            | 6             | 0           | 4.749872                | 0.000528  | 4.021950  |
| 19            | 1             | 0           | 3.188926                | 0.000314  | 2.540766  |
| 20            | 6             | 0           | 7.014503                | -0.000237 | 3.175359  |
| 21            | 1             | 0           | 7.210804                | 0.000409  | 1.026890  |
| 22            | 6             | 0           | 6.121051                | -0.000073 | 4.241583  |
| 23            | 1             | 0           | 4.059420                | 0.000252  | 4.859358  |
| 24            | 1             | 0           | 8.086779                | 0.000007  | 3.330723  |
| 25            | 6             | 0           | 4.701941                | -3.049601 | 1.306971  |
| 26            | 1             | 0           | 5.708164                | -2.782463 | 1.638157  |
| 27            | 1             | 0           | 3.962575                | -2.670862 | 2.017599  |
| 28            | 1             | 0           | 4.638345                | -4.139949 | 1.350527  |
| 29            | 6             | 0           | 4.701766                | 3.049446  | 1.306388  |
| 30            | 1             | 0           | 3.962869                | 2.670540  | 2.017603  |
| 31            | 1             | 0           | 5.708714                | 2.783041  | 1.637691  |
| 32            | 1             | 0           | 4.637613                | 4.139998  | 1.349810  |
| 33            | 6             | 0           | 3.972488                | 4.858272  | -1.214931 |
| 34            | 1             | 0           | 4.712512                | 5.302728  | -0.540606 |
| 35            | 1             | 0           | 4.214383                | 5.245438  | -2.211446 |
| 36            | 6             | 0           | 3.517519                | 2.790269  | -3.693556 |
| 37            | 1             | 0           | 4.187662                | 2.269468  | -4.385011 |
| 38            | 1             | 0           | 2.491161                | 2.464015  | -3.888709 |
| 39            | 1             | 0           | 3.573085                | 3.857158  | -3.931429 |
| 40            | 6             | 0           | 3.517430                | -2.791239 | -3.693905 |
| 41            | 1             | 0           | 4.187649                | -2.270205 | -4.384580 |
| 42            | 1             | 0           | 3.573060                | -3.857661 | -3.930215 |
| 43            | 1             | 0           | 2.490670                | -2.464382 | -3.888427 |
| 44            | 6             | 0           | 3.972402                | -4.858180 | -1.213884 |

|     |   |   |           |           |           |
|-----|---|---|-----------|-----------|-----------|
| 45  | 1 | 0 | 4.711873  | -5.303232 | -0.539155 |
| 46  | 1 | 0 | 4.214048  | -5.245398 | -2.210371 |
| 47  | 6 | 0 | 2.578862  | -5.325459 | -0.823820 |
| 48  | 1 | 0 | 2.527762  | -6.418602 | -0.836131 |
| 49  | 1 | 0 | 2.311689  | -4.984969 | 0.182559  |
| 50  | 1 | 0 | 1.824519  | -4.942646 | -1.519168 |
| 51  | 6 | 0 | 2.578509  | 5.325980  | -0.824386 |
| 52  | 1 | 0 | 1.824762  | 4.942668  | -1.519446 |
| 53  | 1 | 0 | 2.311585  | 4.985262  | 0.182089  |
| 54  | 1 | 0 | 2.527969  | 6.418710  | -0.836937 |
| 55  | 8 | 0 | 6.562205  | 0.000177  | 5.532543  |
| 56  | 1 | 0 | 7.532938  | -0.000175 | 5.514434  |
| 57  | 6 | 0 | -5.771953 | 1.213378  | -0.858677 |
| 58  | 6 | 0 | -6.136284 | -0.000255 | -0.055904 |
| 59  | 6 | 0 | -5.963821 | -0.000019 | 1.288262  |
| 60  | 6 | 0 | -5.409093 | 1.213079  | 1.972787  |
| 61  | 6 | 0 | -5.079386 | 2.309289  | 1.247674  |
| 62  | 6 | 0 | -5.269783 | 2.309822  | -0.239624 |
| 63  | 6 | 0 | -5.183231 | 0.749777  | -2.156641 |
| 64  | 6 | 0 | -5.182923 | -0.749915 | -2.156603 |
| 65  | 6 | 0 | -5.772308 | -1.212602 | -0.858781 |
| 66  | 6 | 0 | -5.270280 | -2.309353 | -0.239028 |
| 67  | 6 | 0 | -5.408473 | -1.213121 | 1.972643  |
| 68  | 6 | 0 | -4.510493 | 0.749967  | 3.080211  |
| 69  | 6 | 0 | -3.369878 | 1.427239  | 3.356442  |
| 70  | 6 | 0 | -3.005547 | 2.640871  | 2.553669  |
| 71  | 6 | 0 | -3.817636 | 3.059074  | 1.552581  |
| 72  | 6 | 0 | -3.228130 | 3.522513  | 0.253567  |
| 73  | 6 | 0 | -4.126418 | 3.059118  | -0.854038 |
| 74  | 6 | 0 | -3.594362 | 2.640270  | -2.027190 |
| 75  | 6 | 0 | -4.149090 | 1.427172  | -2.711715 |
| 76  | 6 | 0 | -4.148703 | -1.427614 | -2.711945 |
| 77  | 6 | 0 | -3.005338 | -0.678318 | -3.326359 |
| 78  | 6 | 0 | -3.005211 | 0.677729  | -3.326308 |
| 79  | 6 | 0 | -1.743341 | 1.428266  | -3.022593 |
| 80  | 6 | 0 | -2.107231 | 2.640817  | -2.218740 |
| 81  | 6 | 0 | -1.294836 | 3.060919  | -1.217645 |
| 82  | 6 | 0 | -1.883679 | 3.523767  | 0.081511  |
| 83  | 6 | 0 | -0.986054 | 3.060875  | 1.188974  |
| 84  | 6 | 0 | -1.518331 | 2.641620  | 2.363094  |
| 85  | 6 | 0 | -4.511161 | -0.749505 | 3.080288  |
| 86  | 6 | 0 | 0.069267  | -0.750138 | 2.493658  |
| 87  | 6 | 0 | -0.963899 | -1.427752 | 3.048693  |
| 88  | 6 | 0 | -1.518712 | -2.641054 | 2.363192  |
| 89  | 6 | 0 | -0.985888 | -3.061075 | 1.190218  |
| 90  | 6 | 0 | 0.157683  | -2.310826 | 0.575587  |
| 91  | 6 | 0 | 1.011100  | 0.000201  | 0.392813  |
| 92  | 6 | 0 | 0.655456  | 1.213450  | 1.193750  |
| 93  | 6 | 0 | 0.069166  | 0.750508  | 2.493404  |
| 94  | 6 | 0 | -0.964079 | 1.427987  | 3.048707  |
| 95  | 6 | 0 | -2.107615 | 0.678286  | 3.661170  |
| 96  | 6 | 0 | -2.107657 | -0.677558 | 3.662094  |
| 97  | 6 | 0 | -3.005722 | -2.640849 | 2.553551  |
| 98  | 6 | 0 | -3.817619 | -3.058839 | 1.552998  |
| 99  | 6 | 0 | -3.228008 | -3.522862 | 0.254019  |
| 100 | 6 | 0 | -1.884055 | -3.523719 | 0.081421  |
| 101 | 6 | 0 | -1.295729 | -3.061015 | -1.217337 |
| 102 | 6 | 0 | -0.033895 | -2.311027 | -0.911455 |
| 103 | 6 | 0 | 0.289281  | -1.212121 | -1.635533 |
| 104 | 6 | 0 | 0.835677  | 0.000076  | -0.949067 |
| 105 | 6 | 0 | 0.157910  | 2.311635  | 0.575357  |
| 106 | 6 | 0 | -0.033874 | 2.310480  | -0.911469 |

|     |   |   |           |           |           |
|-----|---|---|-----------|-----------|-----------|
| 107 | 6 | 0 | 0.289138  | 1.211748  | -1.635971 |
| 108 | 6 | 0 | -0.603827 | 0.749710  | -2.746374 |
| 109 | 6 | 0 | -0.603519 | -0.749982 | -2.746336 |
| 110 | 6 | 0 | -1.743366 | -1.428428 | -3.022390 |
| 111 | 6 | 0 | -2.107406 | -2.640903 | -2.218858 |
| 112 | 6 | 0 | -3.594330 | -2.640495 | -2.027524 |
| 113 | 6 | 0 | -4.126400 | -3.058796 | -0.853621 |
| 114 | 6 | 0 | -3.369491 | -1.427547 | 3.356212  |
| 115 | 6 | 0 | -5.079762 | -2.309136 | 1.247078  |
| 116 | 6 | 0 | 0.654894  | -1.213484 | 1.193862  |

---

#### 4. Coordinates of Monte Carlo global minimum conformer of **A3/1 adduct**

| Center Number | Atomic Number | Atomic Type | Coordinates (Angstroms) |           |           |
|---------------|---------------|-------------|-------------------------|-----------|-----------|
|               |               |             | X                       | Y         | Z         |
| 1             | 7             | 0           | -4.505566               | -0.434918 | 2.409293  |
| 2             | 6             | 0           | -3.313656               | 0.240212  | 2.242796  |
| 3             | 6             | 0           | -3.161958               | 1.525534  | 1.659796  |
| 4             | 6             | 0           | -4.369601               | 2.122513  | 1.207026  |
| 5             | 7             | 0           | -5.634764               | 1.588098  | 1.334136  |
| 6             | 6             | 0           | -2.347085               | -0.618846 | 2.781559  |
| 7             | 6             | 0           | -3.024321               | -1.816098 | 3.249404  |
| 8             | 6             | 0           | -4.568404               | 3.342586  | 0.549683  |
| 9             | 6             | 0           | -4.376294               | -1.647603 | 3.004460  |
| 10            | 6             | 0           | -5.998749               | 3.542981  | 0.401643  |
| 11            | 6             | 0           | -6.624213               | 2.411974  | 0.898561  |
| 12            | 5             | 0           | -5.886343               | 0.154606  | 1.908453  |
| 13            | 9             | 0           | -6.762429               | 0.228496  | 2.969876  |
| 14            | 9             | 0           | -6.362166               | -0.533958 | 1.096032  |
| 15            | 6             | 0           | -1.877561               | 2.230854  | 1.623546  |
| 16            | 6             | 0           | -1.566796               | 3.179209  | 2.614947  |
| 17            | 6             | 0           | -0.923948               | 1.982167  | 0.622131  |
| 18            | 6             | 0           | -0.347364               | 3.859899  | 2.602569  |
| 19            | 1             | 0           | -2.289817               | 3.384797  | 3.401796  |
| 20            | 6             | 0           | 0.304307                | 2.648376  | 0.617063  |
| 21            | 1             | 0           | -1.127401               | 1.243224  | -0.147565 |
| 22            | 6             | 0           | 0.580806                | 3.584574  | 1.606723  |
| 23            | 1             | 0           | -0.120316               | 4.589525  | 3.371566  |
| 24            | 1             | 0           | 1.034158                | 2.413050  | -0.152264 |
| 25            | 6             | 0           | -3.541738               | 4.311869  | 0.062785  |
| 26            | 1             | 0           | -3.092707               | 4.856175  | 0.898095  |
| 27            | 1             | 0           | -2.763092               | 3.805322  | -0.513968 |
| 28            | 1             | 0           | -3.976049               | 5.056794  | -0.610968 |
| 29            | 6             | 0           | -0.869249               | -0.413125 | 2.878734  |
| 30            | 1             | 0           | -0.417360               | -0.378153 | 1.884627  |
| 31            | 1             | 0           | -0.634162               | 0.501518  | 3.429607  |
| 32            | 1             | 0           | -0.375275               | -1.229691 | 3.413803  |
| 33            | 6             | 0           | -2.396569               | -3.019420 | 3.884861  |
| 34            | 1             | 0           | -1.589267               | -2.711248 | 4.558825  |
| 35            | 1             | 0           | -3.129954               | -3.531433 | 4.519538  |
| 36            | 6             | 0           | -5.546118               | -2.508866 | 3.299080  |
| 37            | 1             | 0           | -6.013492               | -2.199560 | 4.239877  |
| 38            | 1             | 0           | -6.303338               | -2.466073 | 2.512626  |
| 39            | 1             | 0           | -5.248377               | -3.557231 | 3.398283  |
| 40            | 6             | 0           | -8.053830               | 2.044063  | 1.023369  |
| 41            | 1             | 0           | -8.233940               | 1.006558  | 0.727430  |
| 42            | 1             | 0           | -8.389937               | 2.171140  | 2.057441  |
| 43            | 1             | 0           | -8.681322               | 2.673638  | 0.385175  |
| 44            | 6             | 0           | -6.686752               | 4.742464  | -0.173357 |



|     |   |   |           |           |           |
|-----|---|---|-----------|-----------|-----------|
| 45  | 1 | 0 | -6.101415 | 5.645153  | 0.035505  |
| 46  | 1 | 0 | -7.651269 | 4.891942  | 0.328169  |
| 47  | 6 | 0 | -6.919124 | 4.622552  | -1.671227 |
| 48  | 1 | 0 | -7.412906 | 5.523277  | -2.051034 |
| 49  | 1 | 0 | -5.974799 | 4.500658  | -2.212065 |
| 50  | 1 | 0 | -7.555496 | 3.763406  | -1.905689 |
| 51  | 6 | 0 | -1.859829 | -4.002268 | 2.855855  |
| 52  | 1 | 0 | -2.653071 | -4.343747 | 2.181977  |
| 53  | 1 | 0 | -1.073728 | -3.546306 | 2.244185  |
| 54  | 1 | 0 | -1.434546 | -4.878762 | 3.353199  |
| 55  | 8 | 0 | 1.768703  | 4.256027  | 1.637359  |
| 56  | 1 | 0 | 2.368740  | 3.838611  | 0.976561  |
| 57  | 7 | 0 | 5.756666  | -1.603261 | -1.408799 |
| 58  | 6 | 0 | 4.474304  | -2.110686 | -1.401024 |
| 59  | 6 | 0 | 3.310038  | -1.434422 | -1.855648 |
| 60  | 6 | 0 | 3.537936  | -0.126336 | -2.358715 |
| 61  | 7 | 0 | 4.759696  | 0.508684  | -2.427713 |
| 62  | 6 | 0 | 4.605290  | -3.391066 | -0.849964 |
| 63  | 6 | 0 | 6.014206  | -3.619009 | -0.577157 |
| 64  | 6 | 0 | 2.629444  | 0.801499  | -2.883858 |
| 65  | 6 | 0 | 6.691489  | -2.462715 | -0.926480 |
| 66  | 6 | 0 | 3.374122  | 1.988046  | -3.267174 |
| 67  | 6 | 0 | 4.704022  | 1.758434  | -2.955384 |
| 68  | 5 | 0 | 6.069870  | -0.130432 | -1.834847 |
| 69  | 9 | 0 | 7.057271  | -0.130516 | -2.800694 |
| 70  | 9 | 0 | 6.461766  | 0.496816  | -0.909092 |
| 71  | 6 | 0 | 1.985190  | -2.057665 | -1.849700 |
| 72  | 6 | 0 | 1.578839  | -2.872705 | -2.920583 |
| 73  | 6 | 0 | 1.091650  | -1.856955 | -0.784649 |
| 74  | 6 | 0 | 0.319278  | -3.475825 | -2.921966 |
| 75  | 1 | 0 | 2.256530  | -3.037084 | -3.755482 |
| 76  | 6 | 0 | -0.175481 | -2.448927 | -0.789560 |
| 77  | 1 | 0 | 1.382178  | -1.221121 | 0.049826  |
| 78  | 6 | 0 | -0.547206 | -3.256884 | -1.859063 |
| 79  | 1 | 0 | 0.015777  | -4.106072 | -3.750919 |
| 80  | 1 | 0 | -0.854287 | -2.263182 | 0.037579  |
| 81  | 6 | 0 | 1.149095  | 0.664374  | -3.038957 |
| 82  | 1 | 0 | 0.899796  | -0.173490 | -3.694028 |
| 83  | 1 | 0 | 0.666772  | 0.533870  | -2.067685 |
| 84  | 1 | 0 | 0.699353  | 1.555683  | -3.486328 |
| 85  | 6 | 0 | 3.533608  | -4.388645 | -0.555747 |
| 86  | 1 | 0 | 2.755530  | -3.954939 | 0.078478  |
| 87  | 1 | 0 | 3.092139  | -4.769932 | -1.480647 |
| 88  | 1 | 0 | 3.919699  | -5.253903 | -0.008817 |
| 89  | 6 | 0 | 6.633355  | -4.860226 | -0.013219 |
| 90  | 1 | 0 | 6.099621  | -5.744359 | -0.378781 |
| 91  | 1 | 0 | 7.661188  | -4.963563 | -0.380071 |
| 92  | 6 | 0 | 8.125411  | -2.093651 | -0.866664 |
| 93  | 1 | 0 | 8.559554  | -2.080127 | -1.870622 |
| 94  | 1 | 0 | 8.269047  | -1.108576 | -0.413207 |
| 95  | 1 | 0 | 8.694930  | -2.808710 | -0.264779 |
| 96  | 6 | 0 | 5.918944  | 2.589626  | -3.117782 |
| 97  | 1 | 0 | 6.503728  | 2.244258  | -3.975155 |
| 98  | 1 | 0 | 5.661601  | 3.639912  | -3.286830 |
| 99  | 1 | 0 | 6.555791  | 2.555492  | -2.229362 |
| 100 | 6 | 0 | 2.825127  | 3.241673  | -3.877517 |
| 101 | 1 | 0 | 2.015546  | 2.997032  | -4.574032 |
| 102 | 1 | 0 | 3.597742  | 3.729454  | -4.484430 |
| 103 | 6 | 0 | 2.321156  | 4.224494  | -2.832165 |
| 104 | 1 | 0 | 1.941122  | 5.130574  | -3.315253 |
| 105 | 1 | 0 | 1.509246  | 3.791277  | -2.238949 |
| 106 | 1 | 0 | 3.121761  | 4.516815  | -2.144313 |

|     |    |   |           |           |           |
|-----|----|---|-----------|-----------|-----------|
| 107 | 6  | 0 | 6.645715  | -4.865190 | 1.508279  |
| 108 | 1  | 0 | 7.227063  | -4.024330 | 1.900549  |
| 109 | 1  | 0 | 5.632310  | -4.792077 | 1.915347  |
| 110 | 1  | 0 | 7.095133  | -5.791149 | 1.880018  |
| 111 | 8  | 0 | -1.771618 | -3.856416 | -1.903557 |
| 112 | 1  | 0 | -2.313477 | -3.497827 | -1.164268 |
| 113 | 6  | 0 | -5.938891 | -2.806813 | -0.519534 |
| 114 | 6  | 0 | -7.120819 | -2.190982 | -0.967908 |
| 115 | 6  | 0 | -7.063679 | -0.945663 | -1.620128 |
| 116 | 6  | 0 | -5.819005 | -0.316456 | -1.825549 |
| 117 | 6  | 0 | -4.637914 | -0.933360 | -1.376786 |
| 118 | 6  | 0 | -4.694790 | -2.173966 | -0.721292 |
| 119 | 17 | 0 | -3.082623 | -0.238391 | -1.754039 |
| 120 | 17 | 0 | -5.735233 | 1.171175  | -2.731914 |
| 121 | 17 | 0 | -8.646200 | -3.025315 | -0.779433 |
| 122 | 8  | 0 | -3.722621 | -2.729775 | -0.491247 |
| 123 | 6  | 0 | 4.588358  | 2.105712  | 0.785979  |
| 124 | 6  | 0 | 5.932932  | 2.428204  | 1.031807  |
| 125 | 6  | 0 | 6.782708  | 1.484949  | 1.637621  |
| 126 | 6  | 0 | 6.285403  | 0.215986  | 1.998772  |
| 127 | 6  | 0 | 4.936893  | -0.101927 | 1.762247  |
| 128 | 6  | 0 | 4.090265  | 0.838957  | 1.154095  |
| 129 | 17 | 0 | 6.507636  | 4.036724  | 0.662504  |
| 130 | 8  | 0 | 2.970349  | 0.625032  | 1.098958  |
| 131 | 17 | 0 | 7.318980  | -0.924898 | 2.819668  |
| 132 | 8  | 0 | -5.994561 | -3.997369 | -0.073032 |
| 133 | 17 | 0 | -8.524679 | -0.220949 | -2.241951 |
| 134 | 17 | 0 | 8.436446  | 1.909601  | 1.998997  |
| 135 | 17 | 0 | 4.262823  | -1.606915 | 2.344803  |
| 136 | 8  | 0 | 3.793458  | 3.024051  | 0.396429  |

## 5. Coordinates of Monte Carlo global minimum conformer of **A4/1 adduct**

| Center Number | Atomic Number | Atomic Type | Coordinates (Angstroms) |           |           |
|---------------|---------------|-------------|-------------------------|-----------|-----------|
|               |               |             | X                       | Y         | Z         |
| 1             | 7             | 0           | -5.572821               | 0.793212  | -2.146198 |
| 2             | 6             | 0           | -4.266537               | 0.370172  | -2.273897 |
| 3             | 6             | 0           | -3.785633               | -0.936611 | -1.996163 |
| 4             | 6             | 0           | -4.775835               | -1.860241 | -1.569013 |
| 5             | 7             | 0           | -6.112536               | -1.579383 | -1.381113 |
| 6             | 6             | 0           | -3.576697               | 1.499322  | -2.732259 |
| 7             | 6             | 0           | -4.547246               | 2.560264  | -2.945682 |
| 8             | 6             | 0           | -4.652494               | -3.219249 | -1.254740 |
| 9             | 6             | 0           | -5.777039               | 2.079562  | -2.530761 |
| 10            | 6             | 0           | -5.970900               | -3.718048 | -0.901254 |
| 11            | 6             | 0           | -6.847313               | -2.647488 | -0.974036 |
| 12            | 5             | 0           | -6.693438               | -0.129605 | -1.537707 |
| 13            | 9             | 0           | -7.772207               | -0.161581 | -2.389268 |
| 14            | 9             | 0           | -7.059050               | 0.288832  | -0.502939 |
| 15            | 6             | 0           | -2.385965               | -1.315801 | -2.194790 |
| 16            | 6             | 0           | -1.457120               | -1.230857 | -1.144996 |
| 17            | 6             | 0           | -1.939175               | -1.769399 | -3.448261 |
| 18            | 6             | 0           | -0.115420               | -1.572620 | -1.343553 |
| 19            | 1             | 0           | -1.784068               | -0.887336 | -0.165966 |
| 20            | 6             | 0           | -0.600740               | -2.114238 | -3.648789 |
| 21            | 1             | 0           | -2.645312               | -1.844348 | -4.272610 |
| 22            | 6             | 0           | 0.301084                | -2.003654 | -2.598304 |
| 23            | 1             | 0           | 0.584112                | -1.496494 | -0.517204 |
| 24            | 1             | 0           | -0.263884               | -2.454904 | -4.621285 |

|    |   |   |           |           |           |
|----|---|---|-----------|-----------|-----------|
| 25 | 6 | 0 | -3.420931 | -4.064068 | -1.262044 |
| 26 | 1 | 0 | -3.000159 | -4.134133 | -2.267149 |
| 27 | 1 | 0 | -2.672418 | -3.668017 | -0.570654 |
| 28 | 1 | 0 | -3.624448 | -5.088127 | -0.936134 |
| 29 | 6 | 0 | -2.113885 | 1.652497  | -2.993587 |
| 30 | 1 | 0 | -1.528220 | 1.381291  | -2.111389 |
| 31 | 1 | 0 | -1.804709 | 1.045236  | -3.848161 |
| 32 | 1 | 0 | -1.846619 | 2.687501  | -3.223965 |
| 33 | 6 | 0 | -4.281662 | 3.921939  | -3.513718 |
| 34 | 1 | 0 | -3.481151 | 3.863636  | -4.258914 |
| 35 | 1 | 0 | -5.166154 | 4.273890  | -4.058248 |
| 36 | 6 | 0 | -7.121426 | 2.699331  | -2.483602 |
| 37 | 1 | 0 | -7.754287 | 2.302950  | -3.282883 |
| 38 | 1 | 0 | -7.614674 | 2.513377  | -1.525170 |
| 39 | 1 | 0 | -7.062491 | 3.784973  | -2.609213 |
| 40 | 6 | 0 | -8.303608 | -2.537175 | -0.723712 |
| 41 | 1 | 0 | -8.544822 | -1.654748 | -0.125053 |
| 42 | 1 | 0 | -8.849534 | -2.475095 | -1.670134 |
| 43 | 1 | 0 | -8.678792 | -3.407537 | -0.176638 |
| 44 | 6 | 0 | -6.331743 | -5.122292 | -0.528163 |
| 45 | 1 | 0 | -5.742233 | -5.828386 | -1.123495 |
| 46 | 1 | 0 | -7.378417 | -5.321586 | -0.786968 |
| 47 | 6 | 0 | -6.122859 | -5.405869 | 0.951012  |
| 48 | 1 | 0 | -6.365426 | -6.449816 | 1.173711  |
| 49 | 1 | 0 | -5.085924 | -5.225853 | 1.251989  |
| 50 | 1 | 0 | -6.767464 | -4.771200 | 1.567436  |
| 51 | 6 | 0 | -3.912243 | 4.944381  | -2.451248 |
| 52 | 1 | 0 | -4.742718 | 5.106503  | -1.757564 |
| 53 | 1 | 0 | -3.042274 | 4.621621  | -1.870360 |
| 54 | 1 | 0 | -3.672661 | 5.904620  | -2.917986 |
| 55 | 8 | 0 | 1.604085  | -2.327154 | -2.837381 |
| 56 | 1 | 0 | 2.136348  | -2.028205 | -2.064443 |
| 57 | 7 | 0 | 6.088857  | 1.585379  | 1.243796  |
| 58 | 6 | 0 | 4.748242  | 1.842472  | 1.439752  |
| 59 | 6 | 0 | 3.783718  | 0.909171  | 1.901372  |
| 60 | 6 | 0 | 4.290103  | -0.391759 | 2.165305  |
| 61 | 7 | 0 | 5.603622  | -0.786159 | 2.030648  |
| 62 | 6 | 0 | 4.589805  | 3.184493  | 1.072098  |
| 63 | 6 | 0 | 5.881484  | 3.682229  | 0.627515  |
| 64 | 6 | 0 | 3.618156  | -1.543848 | 2.591253  |
| 65 | 6 | 0 | 6.790800  | 2.648277  | 0.773381  |
| 66 | 6 | 0 | 4.593594  | -2.616049 | 2.701471  |
| 67 | 6 | 0 | 5.826362  | -2.084843 | 2.361138  |
| 68 | 5 | 0 | 6.703098  | 0.157729  | 1.434448  |
| 69 | 9 | 0 | 7.755405  | 0.232184  | 2.303133  |
| 70 | 9 | 0 | 7.108356  | -0.267654 | 0.401675  |
| 71 | 6 | 0 | 2.378496  | 1.262637  | 2.110788  |
| 72 | 6 | 0 | 1.435859  | 1.131668  | 1.077531  |
| 73 | 6 | 0 | 1.940243  | 1.736040  | 3.359799  |
| 74 | 6 | 0 | 0.091539  | 1.450379  | 1.287994  |
| 75 | 1 | 0 | 1.754326  | 0.770141  | 0.102089  |
| 76 | 6 | 0 | 0.597527  | 2.055389  | 3.571683  |
| 77 | 1 | 0 | 2.656010  | 1.845514  | 4.171139  |
| 78 | 6 | 0 | -0.316758 | 1.900815  | 2.537432  |
| 79 | 1 | 0 | -0.618842 | 1.341292  | 0.473215  |
| 80 | 1 | 0 | 0.267180  | 2.411698  | 4.542471  |
| 81 | 6 | 0 | 2.162737  | -1.714408 | 2.883712  |
| 82 | 1 | 0 | 1.843447  | -1.045415 | 3.686084  |
| 83 | 1 | 0 | 1.563276  | -1.537618 | 1.987014  |
| 84 | 1 | 0 | 1.928549  | -2.728441 | 3.221445  |
| 85 | 6 | 0 | 3.344308  | 4.008699  | 1.091019  |
| 86 | 1 | 0 | 2.608586  | 3.617528  | 0.382998  |

|     |    |   |           |           |           |
|-----|----|---|-----------|-----------|-----------|
| 87  | 1  | 0 | 2.913940  | 4.045925  | 2.094262  |
| 88  | 1  | 0 | 3.535992  | 5.046979  | 0.805156  |
| 89  | 6  | 0 | 6.189497  | 5.052771  | 0.110344  |
| 90  | 1  | 0 | 7.024290  | 5.006458  | -0.598714 |
| 91  | 1  | 0 | 5.338936  | 5.438015  | -0.464223 |
| 92  | 6  | 0 | 8.250067  | 2.561533  | 0.526004  |
| 93  | 1  | 0 | 8.789841  | 2.396477  | 1.463699  |
| 94  | 1  | 0 | 8.488794  | 1.743285  | -0.160603 |
| 95  | 1  | 0 | 8.638081  | 3.482726  | 0.082359  |
| 96  | 6  | 0 | 7.187382  | -2.669369 | 2.316668  |
| 97  | 1  | 0 | 7.836140  | -2.189099 | 3.056100  |
| 98  | 1  | 0 | 7.173025  | -3.740208 | 2.542238  |
| 99  | 1  | 0 | 7.638603  | -2.549842 | 1.328552  |
| 100 | 6  | 0 | 4.332632  | -4.034406 | 3.104668  |
| 101 | 1  | 0 | 5.069517  | -4.698101 | 2.638487  |
| 102 | 1  | 0 | 3.360481  | -4.361822 | 2.719357  |
| 103 | 6  | 0 | 4.374374  | -4.222994 | 4.613043  |
| 104 | 1  | 0 | 4.180799  | -5.269813 | 4.869691  |
| 105 | 1  | 0 | 5.354633  | -3.949507 | 5.018351  |
| 106 | 1  | 0 | 3.620220  | -3.605934 | 5.112629  |
| 107 | 6  | 0 | 6.535639  | 6.027975  | 1.225234  |
| 108 | 1  | 0 | 5.706497  | 6.132313  | 1.932813  |
| 109 | 1  | 0 | 7.414625  | 5.691193  | 1.784650  |
| 110 | 1  | 0 | 6.754671  | 7.016327  | 0.810587  |
| 111 | 8  | 0 | -1.624068 | 2.197926  | 2.788301  |
| 112 | 1  | 0 | -2.158565 | 1.868157  | 2.029617  |
| 113 | 6  | 0 | -5.627988 | 2.036446  | 1.356209  |
| 114 | 6  | 0 | -6.959623 | 1.873701  | 1.762278  |
| 115 | 6  | 0 | -7.401327 | 0.618758  | 2.217998  |
| 116 | 6  | 0 | -6.517153 | -0.475187 | 2.263671  |
| 117 | 6  | 0 | -5.183887 | -0.310905 | 1.858588  |
| 118 | 6  | 0 | -4.743126 | 0.944206  | 1.403154  |
| 119 | 17 | 0 | -4.031003 | -1.605620 | 2.055630  |
| 120 | 17 | 0 | -7.064584 | -1.987621 | 2.938218  |
| 121 | 17 | 0 | -8.054444 | 3.233707  | 1.795484  |
| 122 | 8  | 0 | -3.503142 | 1.141205  | 1.213240  |
| 123 | 6  | 0 | 5.671734  | -2.101598 | -1.418049 |
| 124 | 6  | 0 | 6.978483  | -1.854876 | -1.861190 |
| 125 | 6  | 0 | 7.326365  | -0.574964 | -2.333399 |
| 126 | 6  | 0 | 6.371292  | 0.458031  | -2.360328 |
| 127 | 6  | 0 | 5.061192  | 0.205900  | -1.928566 |
| 128 | 6  | 0 | 4.715273  | -1.072071 | -1.454518 |
| 129 | 17 | 0 | 3.817612  | 1.414857  | -2.122632 |
| 130 | 17 | 0 | 8.157910  | -3.140514 | -1.921271 |
| 131 | 8  | 0 | 3.495230  | -1.349070 | -1.235699 |
| 132 | 17 | 0 | 5.182661  | -3.710432 | -0.945530 |
| 133 | 17 | 0 | 6.803418  | 2.006075  | -3.044560 |
| 134 | 8  | 0 | 8.459440  | -0.392976 | -2.870899 |
| 135 | 8  | 0 | -8.558051 | 0.509692  | 2.725512  |
| 136 | 17 | 0 | -5.019408 | 3.611426  | 0.920213  |

## 6. Coordinates of Monte Carlo global minimum conformer of **A5/1 adduct**

| Center Number | Atomic Number | Atomic Type | Coordinates (Angstroms) |           |          |
|---------------|---------------|-------------|-------------------------|-----------|----------|
|               |               |             | X                       | Y         | Z        |
| 1             | 7             | 0           | -6.159106               | -1.295655 | 1.469809 |
| 2             | 6             | 0           | -4.824831               | -1.511164 | 1.741374 |
| 3             | 6             | 0           | -3.861965               | -0.505736 | 2.020448 |
| 4             | 6             | 0           | -4.367270               | 0.820737  | 2.029785 |

|    |   |   |           |           |           |
|----|---|---|-----------|-----------|-----------|
| 5  | 7 | 0 | -5.681905 | 1.184445  | 1.824585  |
| 6  | 6 | 0 | -4.672492 | -2.901229 | 1.671786  |
| 7  | 6 | 0 | -5.968789 | -3.478062 | 1.357272  |
| 8  | 6 | 0 | -3.694607 | 2.033005  | 2.227008  |
| 9  | 6 | 0 | -6.862324 | -2.429485 | 1.217235  |
| 10 | 6 | 0 | -4.672671 | 3.105600  | 2.148355  |
| 11 | 6 | 0 | -5.906215 | 2.521122  | 1.918066  |
| 12 | 5 | 0 | -6.766389 | 0.155663  | 1.356579  |
| 13 | 9 | 0 | -7.850553 | 0.247918  | 2.160714  |
| 14 | 9 | 0 | -7.107640 | 0.376847  | 0.274217  |
| 15 | 6 | 0 | -2.463171 | -0.815951 | 2.321913  |
| 16 | 6 | 0 | -1.506770 | -0.927071 | 1.299196  |
| 17 | 6 | 0 | -2.045175 | -1.008742 | 3.649978  |
| 18 | 6 | 0 | -0.170880 | -1.212539 | 1.591739  |
| 19 | 1 | 0 | -1.809881 | -0.786557 | 0.263970  |
| 20 | 6 | 0 | -0.709545 | -1.291243 | 3.945857  |
| 21 | 1 | 0 | -2.770514 | -0.930501 | 4.456745  |
| 22 | 6 | 0 | 0.216991  | -1.383466 | 2.916000  |
| 23 | 1 | 0 | 0.547721  | -1.297707 | 0.782216  |
| 24 | 1 | 0 | -0.395052 | -1.431224 | 4.975501  |
| 25 | 6 | 0 | -2.237146 | 2.255921  | 2.467160  |
| 26 | 1 | 0 | -1.917584 | 1.783124  | 3.398716  |
| 27 | 1 | 0 | -1.642068 | 1.877602  | 1.632364  |
| 28 | 1 | 0 | -1.994852 | 3.318723  | 2.564769  |
| 29 | 6 | 0 | -3.431266 | -3.709005 | 1.868733  |
| 30 | 1 | 0 | -2.672945 | -3.443598 | 1.127605  |
| 31 | 1 | 0 | -3.031040 | -3.572437 | 2.876722  |
| 32 | 1 | 0 | -3.614828 | -4.780187 | 1.748380  |
| 33 | 6 | 0 | -6.294459 | -4.933173 | 1.208799  |
| 34 | 1 | 0 | -5.720361 | -5.519865 | 1.935337  |
| 35 | 1 | 0 | -7.348604 | -5.107047 | 1.457615  |
| 36 | 6 | 0 | -8.309212 | -2.391194 | 0.897276  |
| 37 | 1 | 0 | -8.892230 | -2.152117 | 1.792099  |
| 38 | 1 | 0 | -8.529998 | -1.645202 | 0.128511  |
| 39 | 1 | 0 | -8.657673 | -3.356546 | 0.517089  |
| 40 | 6 | 0 | -7.269753 | 3.088596  | 1.788621  |
| 41 | 1 | 0 | -7.747686 | 2.767322  | 0.859118  |
| 42 | 1 | 0 | -7.896560 | 2.772790  | 2.629174  |
| 43 | 1 | 0 | -7.251829 | 4.182145  | 1.785663  |
| 44 | 6 | 0 | -4.410804 | 4.575268  | 2.288507  |
| 45 | 1 | 0 | -5.165326 | 5.145715  | 1.734425  |
| 46 | 1 | 0 | -3.451101 | 4.831958  | 1.826196  |
| 47 | 6 | 0 | -4.415898 | 5.026242  | 3.741291  |
| 48 | 1 | 0 | -4.224682 | 6.101855  | 3.804945  |
| 49 | 1 | 0 | -5.383084 | 4.824230  | 4.214341  |
| 50 | 1 | 0 | -3.643800 | 4.509372  | 4.321631  |
| 51 | 6 | 0 | -6.022091 | -5.451385 | -0.193953 |
| 52 | 1 | 0 | -6.646635 | -4.936602 | -0.930608 |
| 53 | 1 | 0 | -4.975179 | -5.303974 | -0.479747 |
| 54 | 1 | 0 | -6.244758 | -6.521497 | -0.252958 |
| 55 | 8 | 0 | 1.516149  | -1.641862 | 3.243355  |
| 56 | 1 | 0 | 2.056458  | -1.551656 | 2.425247  |
| 57 | 7 | 0 | 5.668631  | -1.221301 | -1.771234 |
| 58 | 6 | 0 | 4.356199  | -0.856410 | -1.979714 |
| 59 | 6 | 0 | 3.851695  | 0.471819  | -1.967679 |
| 60 | 6 | 0 | 4.812196  | 1.472752  | -1.666807 |
| 61 | 7 | 0 | 6.148065  | 1.253962  | -1.403590 |
| 62 | 6 | 0 | 3.681480  | -2.066515 | -2.176622 |
| 63 | 6 | 0 | 4.655798  | -3.142100 | -2.086010 |
| 64 | 6 | 0 | 4.655283  | 2.859103  | -1.557102 |
| 65 | 6 | 0 | 5.890469  | -2.559091 | -1.857323 |
| 66 | 6 | 0 | 5.937245  | 3.426284  | -1.174571 |

|     |    |   |           |           |           |
|-----|----|---|-----------|-----------|-----------|
| 67  | 6  | 0 | 6.844639  | 2.382377  | -1.109548 |
| 68  | 5  | 0 | 6.757920  | -0.191705 | -1.315568 |
| 69  | 9  | 0 | 7.821313  | -0.275147 | -2.141148 |
| 70  | 9  | 0 | 7.124695  | -0.420664 | -0.238693 |
| 71  | 6  | 0 | 2.452772  | 0.783518  | -2.267476 |
| 72  | 6  | 0 | 1.497364  | 0.893686  | -1.244435 |
| 73  | 6  | 0 | 2.034779  | 0.977275  | -3.595800 |
| 74  | 6  | 0 | 0.161542  | 1.178895  | -1.537942 |
| 75  | 1  | 0 | 1.797542  | 0.750940  | -0.209850 |
| 76  | 6  | 0 | 0.699212  | 1.258551  | -3.892384 |
| 77  | 1  | 0 | 2.760118  | 0.899034  | -4.402567 |
| 78  | 6  | 0 | -0.227394 | 1.350067  | -2.861304 |
| 79  | 1  | 0 | -0.557063 | 1.263098  | -0.728159 |
| 80  | 1  | 0 | 0.384652  | 1.398791  | -4.921064 |
| 81  | 6  | 0 | 3.418538  | 3.671884  | -1.762349 |
| 82  | 1  | 0 | 2.991694  | 3.496459  | -2.753439 |
| 83  | 1  | 0 | 2.675694  | 3.449662  | -0.991277 |
| 84  | 1  | 0 | 3.620331  | 4.745307  | -1.706714 |
| 85  | 6  | 0 | 2.224426  | -2.289053 | -2.423074 |
| 86  | 1  | 0 | 1.627349  | -1.911727 | -1.588149 |
| 87  | 1  | 0 | 1.908739  | -1.810853 | -3.353738 |
| 88  | 1  | 0 | 1.981411  | -3.350007 | -2.525380 |
| 89  | 6  | 0 | 4.391192  | -4.611846 | -2.214914 |
| 90  | 1  | 0 | 5.138862  | -5.179013 | -1.648697 |
| 91  | 1  | 0 | 3.426661  | -4.861398 | -1.756930 |
| 92  | 6  | 0 | 7.251462  | -3.129352 | -1.719004 |
| 93  | 1  | 0 | 7.893687  | -2.791643 | -2.539468 |
| 94  | 1  | 0 | 7.712606  | -2.831532 | -0.772946 |
| 95  | 1  | 0 | 7.235497  | -4.222680 | -1.746065 |
| 96  | 6  | 0 | 8.297328  | 2.340051  | -0.816123 |
| 97  | 1  | 0 | 8.857541  | 2.007087  | -1.694570 |
| 98  | 1  | 0 | 8.679285  | 3.326326  | -0.538865 |
| 99  | 1  | 0 | 8.514211  | 1.660103  | 0.013500  |
| 100 | 6  | 0 | 6.241135  | 4.868468  | -0.904790 |
| 101 | 1  | 0 | 7.049874  | 4.947957  | -0.169736 |
| 102 | 1  | 0 | 5.375240  | 5.353870  | -0.442299 |
| 103 | 6  | 0 | 6.636697  | 5.622160  | -2.165370 |
| 104 | 1  | 0 | 6.850200  | 6.669073  | -1.930576 |
| 105 | 1  | 0 | 7.531614  | 5.185747  | -2.622409 |
| 106 | 1  | 0 | 5.834932  | 5.597632  | -2.911591 |
| 107 | 6  | 0 | 4.406147  | -5.076909 | -3.662194 |
| 108 | 1  | 0 | 3.640834  | -4.563061 | -4.253707 |
| 109 | 1  | 0 | 5.378027  | -4.881518 | -4.128991 |
| 110 | 1  | 0 | 4.212392  | -6.153376 | -3.717493 |
| 111 | 8  | 0 | -1.527630 | 1.604844  | -3.186724 |
| 112 | 1  | 0 | -2.064836 | 1.507402  | -2.368533 |
| 113 | 6  | 0 | -5.059988 | -0.494654 | -1.900899 |
| 114 | 6  | 0 | -6.367695 | -0.785958 | -2.316764 |
| 115 | 6  | 0 | -7.306169 | 0.255261  | -2.442366 |
| 116 | 6  | 0 | -6.948838 | 1.573610  | -2.135628 |
| 117 | 6  | 0 | -5.640340 | 1.863773  | -1.716288 |
| 118 | 6  | 0 | -4.699884 | 0.833432  | -1.608000 |
| 119 | 17 | 0 | -6.817024 | -2.402032 | -2.792728 |
| 120 | 8  | 0 | -3.481395 | 1.131376  | -1.423204 |
| 121 | 6  | 0 | 5.003604  | 0.513801  | 1.942453  |
| 122 | 6  | 0 | 6.302662  | 0.860479  | 2.340771  |
| 123 | 6  | 0 | 7.276563  | -0.143104 | 2.483619  |
| 124 | 6  | 0 | 6.964503  | -1.480919 | 2.209108  |
| 125 | 6  | 0 | 5.667263  | -1.824894 | 1.797737  |
| 126 | 6  | 0 | 4.690316  | -0.831944 | 1.673100  |
| 127 | 17 | 0 | 6.697449  | 2.504881  | 2.771108  |
| 128 | 8  | 0 | 3.483116  | -1.175008 | 1.493940  |

|     |    |   |           |           |           |
|-----|----|---|-----------|-----------|-----------|
| 129 | 17 | 0 | 3.734192  | 1.709391  | 1.924770  |
| 130 | 8  | 0 | 8.399808  | 0.135150  | 2.995047  |
| 131 | 8  | 0 | -8.435425 | 0.027923  | -2.964773 |
| 132 | 17 | 0 | -3.838095 | -1.738380 | -1.881875 |
| 133 | 6  | 0 | 5.306135  | -3.196101 | 1.591067  |
| 134 | 6  | 0 | 7.967290  | -2.484962 | 2.400776  |
| 135 | 7  | 0 | 8.729692  | -3.337128 | 2.603519  |
| 136 | 7  | 0 | 5.052628  | -4.326665 | 1.510884  |
| 137 | 6  | 0 | -7.915467 | 2.616339  | -2.306130 |
| 138 | 6  | 0 | -5.230195 | 3.218504  | -1.489351 |
| 139 | 7  | 0 | -4.937494 | 4.337728  | -1.393034 |
| 140 | 7  | 0 | -8.648593 | 3.497882  | -2.487758 |

---
